# Supplementary material
Source: PubMed Central journal article supplement (PMC5457363)
Supplement: NIHMS833997-supplement-12035_2016_310_MOESM1_ESM.pdf [file NIHMS833997-supplement-12035_2016_310_MOESM1_ESM.pdf]

# SUPPLEMENTARY MATERIAL

**Article Title:**

**Activation of Alpha-7 Nicotinic Acetylcholine Receptor Reduces Blood-Brain Barrier Leakage and Brain Edema in Mice with Ischemic Stroke and Bone Fracture**

**Journal Name:**

*Molecular Neurobiology*

**Authors:**

Dingquan Zou, Man Luo, Zhengyi Han, Lei Zhan, Wan Zhu, Shuai Kang, Chen Bao, Zhao Li, Jeffrey Nelson, Rui Zhang, Hua Su

**Corresponding Author:**

Hua Su, MD  
Center for Cerebrovascular Research  
University of California, San Francisco  
[hua.su@ucsf.edu](mailto:hua.su@ucsf.edu)

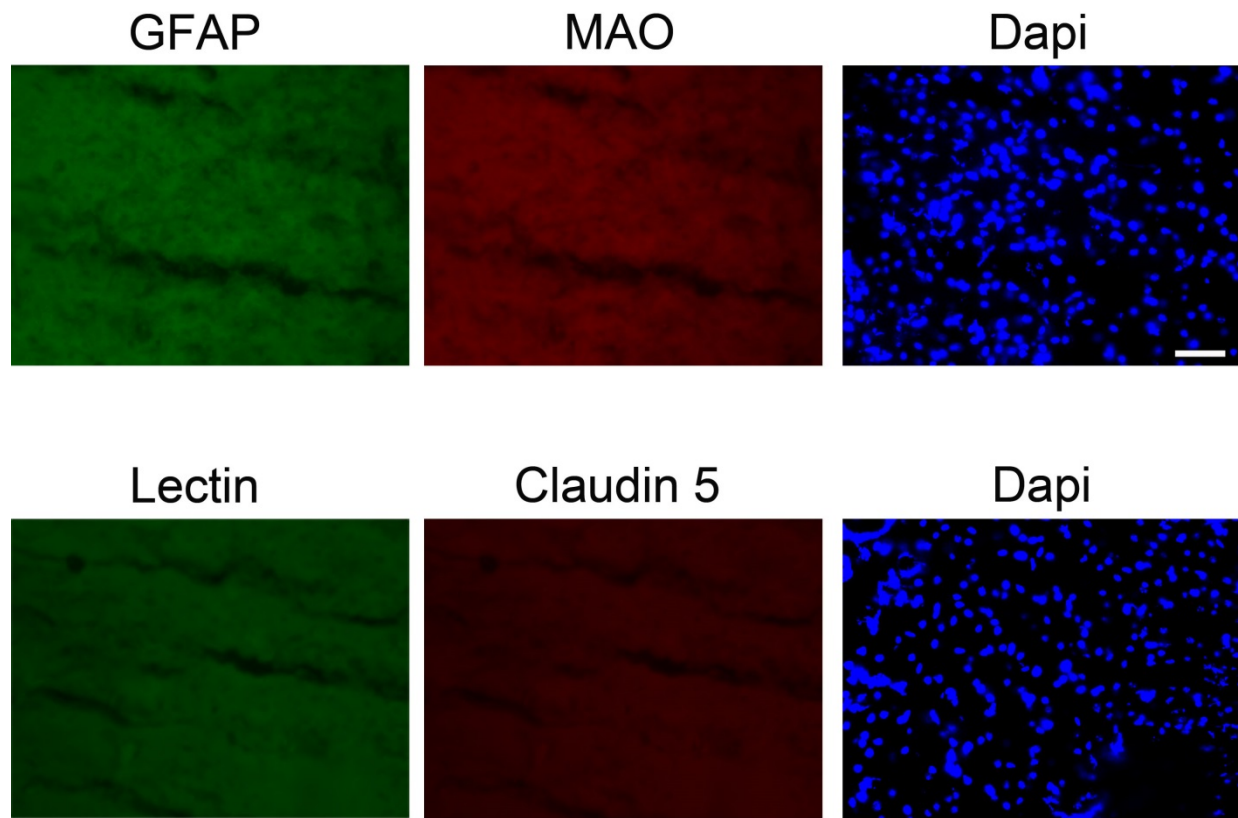

**Supplementary Fig 1** Images of negative controls. The sections collected from saline-treated mice subjected to stroke+tibia fracture. The primary corresponding antibodies were omitted in the staining. Scale bar: 50  $\mu$ m.

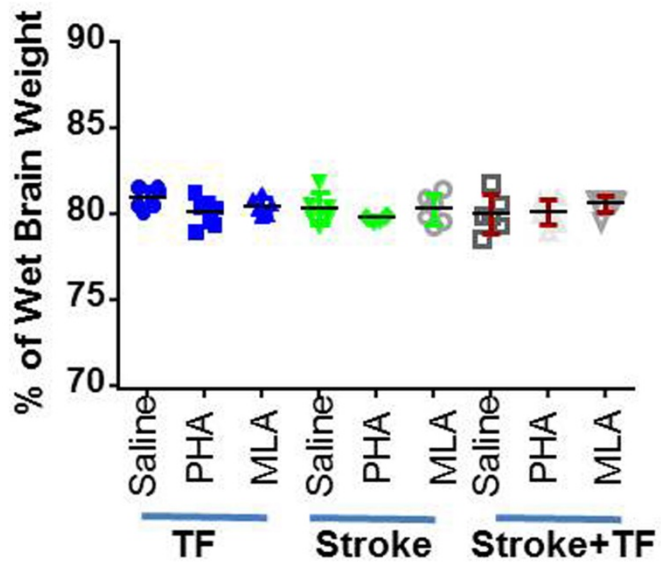

**Supplementary Fig 2** Water content was similar in the contralateral side of the stroke brain of all groups. TF: mice subjected to sham pMCAO and tibia fracture; Stroke: mice subjected to pMCAO and sham tibia fracture; Stroke+TF: mice subjected to both pMCAO and tibia fracture.

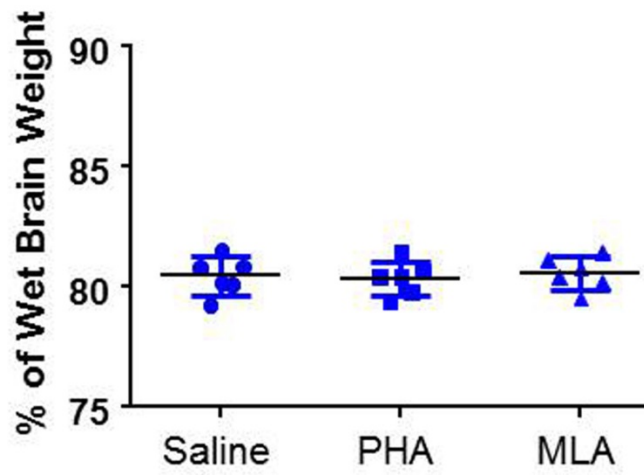

**Supplementary Fig. 3** PHA and MLA treatment did not affect brain water content in tibia fracture mice.
